# Supplementary material for: Co-Expression of type 1 fimbriae and flagella in Escherichia coli: consequences for adhesion at interfaces
Source: Royal Society of Chemistry journal article supplement (doi:10.1039/d4sm00499j), 2024-01-01
Supplement: d4sm00499j1.pdf [file d4sm00499j1.pdf]

## Co-Expression of Type 1 Fimbriae and Flagella in *Escherichia coli*: Consequences for Adhesion at Interfaces

Udayanidhi Ramesh Kumar <sup>a</sup>, Nam T. Nguyen <sup>a</sup>, Narendra K. Dewangan <sup>a</sup>, Sayed Golam Mohiuddin <sup>a</sup>, Mehmet A. Orman <sup>a</sup>, Patrick C. Cirino <sup>\*a</sup>, and Jacinta C. Conrad <sup>\*a</sup>

\*Corresponding authors

<sup>a</sup>Department of Chemical and Biomolecular Engineering, University of Houston, Houston, TX 77204, USA

**E-mail:** [pccirino@uh.edu](mailto:pccirino@uh.edu), [jconrad@uh.edu](mailto:jconrad@uh.edu)

### ELECTRONIC SUPPLEMENTARY INFORMATION

#### Strain construction:

Strain MG1655 $\Delta$ *fimA* was constructed by deleting *fimA* from *E. coli* K-12 MG1655 using the  $\lambda$  Red recombinase-based method, as described by Datsenko and Wanner.<sup>1</sup> The following primers and plasmids were used to generate the knockout cassette: *fimAP1* (forward), *fimAP2* (forward), *fimAP1* (reverse), *fimAP2* (reverse) and plasmid pKD13. The kanamycin resistance gene was removed using plasmid pCP20.

#### Plasmid construction:

Plasmid pPCC2000 (“p(blank)”) was derived from vector pPCC1322<sup>2</sup>, carrying the *lac* repressor gene (*lacI*) and apramycin resistance gene (*aac*).

Plasmid pPCC2208 was constructed by linearizing plasmid pPCC1401 with XbaI restriction enzyme (New England Biolabs). Next, a gene construct containing *Ptac-fliC-flhD-flhC* was assembled by amplifying *fliC* and *flhDC* from *E. coli* MG1655 genomic DNA, and subcloning these into lab plasmid pPCC2206. *Ptac-fliC-flhD-flhC* was then PCR-amplified using Phusion Polymerase (New England Biolabs) and primers p2207P1 (forward) and p2207P1 (reverse). The PCR product was assembled into the linearized pPCC1401 using HiFi DNA Assembly (New England Biolabs).

The complete nucleotide sequences of the plasmids are provided below. The plasmids were sequenced by Plasmidsaurus.

#### Nucleotide sequence of plasmid pPCC2000:

```
AAAAAAAAAAGCCCGCACTGTCAGGTGCGGGCTTTTTTCTGTGTTTGCGCAATTAACCCT  
CACTAAAGGGAACAAAAGCTGGAAGCTTTCTCTGAATGGCGGGAGTATGAAAAGTTGAG  
CAAAGGCCAGCAAAAAGGCCAGGAACCGTAAAAAGGCCGCGTTGCTGGCGTTTTTCCAT
```

AGGCTCCGCCCCCTGACGAGCATCACAAAATCGACGCTCAAGTCAGAGGTGGCGAAA  
CCCGACAGGACTATAAAGATACCAGGCGTTTCCCCCTGGAAGCTCCCTCGTGCGCTCTCCT  
GTTCCGACCTGCGCTTACCGGATACCTGTCCGCTTTCTCCCTTCGGGAAGCGTGGCGC  
TTTCTCATAGCTCACGCTGTAGGTATCTCAGTTCGGTGTAGGTCGTTTCGCTCCAAGCTGGG  
CTGTGTGCACGAACCCCCGTTACGCCGACCGCTGCGCCTTATCCGGTAACTATCGTCTT  
GAGTCCAACCCGGTAAGACACGACTTATCGCCACTGGCAGCAGCCACTGGTAACAGGATT  
AGCAGAGCGAGGTATGTAGGCGGTGCTACAGAGTTCTTGAAGTGGTGGCCTAACTACGGC  
TACACTAGAAGGACAGTATTTGGTATCTGCGCTCTGCTGAAGCCAGTTACCTTCGGAAAAA  
GAGTTGGTAGCTCTTGATCCGGCAAACAAACCACCGCTGGTAGCGGTGGTTTTTTTTGTTTG  
CAAGCAGCAGATTACGCGCAGAAAAAAAGGATCTCAAGAAGATCCTTTGATCTTTTCTAC  
GGGGTCTGACGCTCAGTGAACGAAAACCTCACGTTAAGGGATTTTGGTTCATGAGATTATC  
AAAAAGGATCTTCACCTAGATCCTTTTAAATTAATAAATGAAGTTTTAAATCAATCTAAAGTA  
TATATGAGTAAACTTGGTCTGACAGTTACCAATGCTTAATCAGTGAGGCACCTATCTCAGCG  
ATCTGTCTATTTTCGTTTCATCCATAGTTGCCTGACTCCCCGTCGTGTAGATAACTACGATACG  
GGAGGGCTTACCATCTGGCCCCAGTGCTGCAATGATGTGTTGCCCCAGCAATCAGCGCGA  
CCTTGCCCCTCCAACGTCATCTCGTTCTCCGCTCATGAGCTCAGCCAATCGACTGGCGAGC  
GGCATCGCATTCTTCGCATCCCGCCTCTGGCGGATGCAGGAAGATCAACGGATCTCGGCC  
AGTTGACCCAGGGCTGTCCGCAATGTCCGCGGGAGCGGATCAACCGAGCAAAGGCATG  
ACCGACTGGACCTTCCTTCTGAAGGCTCTTCTCCTTGAGCCACCTGTCCGCCAAGGCAAA  
GCGCTCACAGCAGTGGTCATTCTCGAGATAATCGACGCGTACCAACTTGCCATCCTGAAGA  
ATGGTGCAGTGTCTCGGCACCCCATAGGGAACCTTTGCCATCAACTCGGCAAGATGCAGC  
GTCGTGTTGGCATCGTGTCCCACGCCGAGGAGAAGTACCTGCCCATCGAGTTCATGGACA  
CGGGCGACCGGGCTTGCAGGCGAGTGAGGTGGCAGGGGCAATGGATCAGAGATGATCTG  
CTCTGCCTGTGGCCCCGCTGCCGCAAAGGCAAATGGATGGGCGCTGCGCTTTACATTTGG  
CAGGCGCCAGAATGTGTACAGACAACCTCCAAGGTCCGGTGTAACGGGCGACGTGGCAG  
GATCGAACGGCTCGTCCAGACCTGACCACGAGGGCATGACGAGCGTCCCTCCCGGAC  
CCAGCGCAGCACGACGGCCTCGATCAGTCCAAGTGGCCCATCTTCGAGGGGCGGACG  
CTACGGAAGGAGCTGTGGACCAGCAGCACACCGCCGGGGTAACCCCAAGGTTGAGAAG  
CTGACCGATGAGCTCGGCTTTTCGCCATTCGTATTGCACGACATTGCACTCCACCGCTGAT  
GACATCAGTCGATCATAGCACGATCAACGGCACTGTTGCAAATAGTCGGTGGTGATAAACT  
TATCATCCCCTTTTGCTGATGGAGCTGCACATGAACCCATTCAAAGGCCGGCATTTCAGC  
GTGACATCATTCTGTGGGCCGTACGCTGGTACTGCAAATACGGCATCAGTTACCGTGAGCC  
GGATCAGTGAGGGTTTGCAACTGCGGGTCAAGGATCTGGATTCGATCACGGCACGATCA  
TCGTGCGGGAGGGCAAGGGCTCCAAGGATCGGGCCTTGATGTTACCCGAGAGCTTGGCAC  
CCAGCCTGCGCGAGCAGGGGAATTGATCCGGTGGATGACCTTTTGAATGACCTTTAATAGA  
TTATATACTAATTAATTGGGGACCCTAGAGGTCCCCTTTTTTATTTTAAAAATTTTTTCACA  
AAACGGTTTACAAGCATAAAGCTGGCCGCAAGATCCGGCCACGATGCGTCCGGCGTAGAG

GATCTGAAGACTGCAGGAAAAGTGGTGTCTAGAATGAGAATTCTTACGTGTGAAATT  
GTTATCCGCTCACAATTCCACACATTATACGAGCCGATGATTAATTGTCAACAGCTCGCGGC  
CGCGTAGCGAATTTTCCCATGGAATGGTGCAAACCTTTCGCGGTATGGCATGATAGCGC  
CCGGAAGAGAGTCAATTCAGGGTGGTGAATGTGAAACCAGTAACGTTATACGATGTCGCA  
GAGTATGCCGGTGTCTTATCAGACCGTTTCCCGCGTGGTGAACCAGGCCAGCCACGTTT  
CTGCGAAAACGCGGGAAAAAGTGGAAAGCGGCGATGGCGGAGCTGAATTACATCCCAAC  
CGCGTGGCACAACAAGTGGCGGGCAAACAGTCGTTGCTGATTGGCGTTGCCACCTCCAGT  
CTGGCCCTGCACGCGCCGTCGCAAATTGTCGCGGCGATTAATCTCGCGCCGATCAACTG  
GGTGCCAGCGTGGTGGTGTGATGGTAGAACGAAGCGGCGTGAAGCCTGTAAAGCGGC  
GGTGCACAATCTTCTCGCGCAACGCGTCAGTGGGCTGATCATTAACTATCCGCTGGATGAC  
CAGGATGCCATTGCTGTGGAAGCTGCCTGCACTAATGTTCCGGCGTTATTTCTTGATGTCTC  
TGACCAGACACCCATCAACAGTATTATTTTCTCCCATGAAGACGGTACGCGACTGGGCGTG  
GAGCATCTGGTCGCATTGGGTCACCAGCAAATCGCGCTGTTAGCGGGCCCATTAAGTTCTG  
TCTCGGCGCGTCTGCGTCTGGCTGGCTGGCATAAATATCTCACTCGCAATCAAATTCAGCC  
GATAGCGGAACGGGAAGGCGACTGGAGTGCCATGTCCGGTTTTTCAACAAACCATGCAAAT  
GCTGAATGAGGGCATCGTTCCCACTGCGATGCTGGTTGCCAACGATCAGATGGCGCTGGG  
CGCAATGCGCGCCATTACCGAGTCCGGGCTGCGCGTTGGTGC GGATATCTCGGTAGTGGG  
ATACGACGATACCGAAGACAGCTCATGTTATATCCCGCCGTTAACCACCATCAAACAGGAT  
TTTCGCCTGCTGGGGCAAACCAGCGTGGACCGCTTGCTGCAACTCTCTCAGGGCCAGGCG  
GTGAAGGGCAATCAGCTGTTGCCCGTCTCACTGGTAAAAGAAAAACCACCCTGGCGCC  
CAATACGCAAACCGCCTCTCCCCGCGCGTTGGCCGATTCATTAATGCAGCTGGCACGACAG  
GTTTCCCGACTGGAAAGCGGGCAGTGAGCGCAACGCAATTAATGTAAGTTAGTCACTCA  
TTAGGCACCCAGGCTTTACACTTTATGCTTCCGGCTCGTATGTTGTGTGGAATTGTGAGCG  
GATAACAATTTACACAGGAAACAGCTATGACCATGATTACGGATCACTGGCCGTCGTTT  
TACAACGTGCTGACTGGGAAAACCCTGGCGTTACCCAACCTAATCGCCTTGCAGCACATC  
CCCCTTTCGCCAGCTGGCGTAATAGCGAAGAGGCCCGCACCGATCGCCCTTCCCAACAGT  
TGC

**Nucleotide sequence of plasmid pPCC2208:**

AAAAAAACCACCGCTACCAGCGGTGGTTTGTGTTGCCGGATCAAGAGCTACCAACTCTTTT  
TCCGAAGGTAAGTGGCTTCAGCAGAGCGCAGATACCAAATACTGTCCTTCTAGTGTAGCCG  
TAGTTAGGCCACCACTTCAAGAACTCTGTAGCACCGCCTACATACCTCGCTCTGCTAATCC  
TGTTACCAGTGGCTGCTGCCAGTGGCGATAAGTCGTGTCTTACCGGGTTGGACTCAAGAC  
GATAGTTACCGGATAAGGCGCAGCGGTCGGGCTGAACGGGGGGTTCGTGCACACAGCCC  
AGCTTGGAGCGAACGACCTACACCGAACTGAGATACCTACAGCGTGAGCTATGAGAAAGC  
GCCACGCTTCCCGAAGGGAGAAAGGCGGACAGGTATCCGGTAAGCGGCAGGGTCGGAAC  
AGGAGAGCGCACGAGGGAGCTTCCAGGGGGAAACGCCTGGTATCTTTATAGTCTGTCGG

GTTTCGCCACCTCTGACTTGAGCGTCGATTTTTGTGATGCTCGTCAGGGGGGCGGAGCCTA  
TGAAAAACGCCAGCAACGCGGCCTTTTTACGGTTCCTGGCCTTTTGCTGGCCTTTTGCTC  
ACATGTTCTTTCTGCGTTATCCCCTGATTCTGTGGATAACCGTATTACCGCCTTTGAGTGA  
GCTGATACCGCTCGCCGCAGCCGAACGACCGAGCGCAGCGAGTCAGTGAGCGAGGAAGC  
GGAAGAGCGCCTGATGCGGTATTTCTCCTTACGCATCTGTGCGGTATTTACACCGCATA  
AGATCCTGACGCGCCCTGTAGCGGCGCATTAAAGCGCGGCGGGTGTGGTGGTTACGCGCAG  
CGTGACCGCTACACTTGCCAGCGCCCTAGCGCCCGCTCCTTTTCGCTTTCTTCCCTTCCTTC  
TCGCCACGTTTCGCGGGCTTTCCCGTCAAGCTCTAAATCGGGGGCTCCCTTTAGGGTTCCG  
ATTTAGTGCTTTACGGCACCTCGACCCCAAAAACTTGATTAGGGTGATGGTTCACGTAGT  
GGGCCATCGCCCTGATAGACGGTTTTTTCGCCCTTTGACGTTGGAGTCCACGTTCTTTAATA  
GTGGACTCTTGTTCCAAACTGGAACAACACTCAACCTATCTCGGTCTATTCTTTTGATTTA  
TAAGGGATTTTGCCGATTTTCGGCCTATTGGTTAAAAAATGAGCTGATTTAACAAAAATTTAA  
CGCGAATTTTAAACAAAATATTAACGTTTACAGGATCTGTATGGTGCCTCTCAGTACAATCT  
GCTCTGATGCCGCATAGTTAAGCCAGTATACTCCGCTATCGCTACGTGACTGCCTCGACC  
TGCAGCAATTCCAACGCCATCAAAAATAATTCGCGTCTGGCCTTCCTGTAGCCAGCTTTCA  
TCAACATTAATGTGAGCGAGTAACAACCCGTCGGATTCTCCGTGGGAACAAACGGCGGA  
TTGACCGTAATGGGATAGGTCACGTTGGTGTAGATGGGCGCATCGTAACCGTGCATCTGCC  
AGTTTGAGGGGACGACGACAGTATCGGCCTCAGGAAGATCGCACTCCAGCCAGCTTTCCG  
GCACCGCTTCTGGTGCCGAAACCAGGCAAAGCGCCATTCGCCATTCAGGCTGCGCAACT  
GTTGGGAAGGGCGATCGGTGCGGGCCTCTTCGCTATTACGCCAGCTGGCGAAAGGGGGAT  
GTGCTGCAAGGCGATTAAGTTGGGTAACGCCAGGGTTTTCCAGTCACGACGTTGTAAAA  
CGACGGCCAGTGAATCCGTAATCATGGTCATAGCTGTTTCTGTGTGAAATTGTTATCCGCT  
CACAATTCCACACAACATACGAGCCGGAAGCATAAAGTGTAAGCCTGGGGTGCCTAATG  
AGTGAGCTAACTTACATTAATTGCGTTGCGCTCACTGCCCGCTTTCCAGTCGGGAAACCTG  
TCGTGCCAGCTGCATTAATGAATCGGCCAACGCGCGGGGAGAGGCGGTTTTCGCTATTGGG  
CGCCAGGGTGGTTTTTCTTTTACCAGTGAGACGGGCAACAGCTGATTGCCCTTCACCGC  
CTGGCCCTGAGAGAGTTGCAGCAAGCGGTCCACGCTGGTTTGGCCAGCAGGCGAAAAT  
CCTGTTTGATGGTGGTTAACGGCGGGATATAACATGAGCTGTCTTCGGTATCGTCGTATCCC  
ACTACCGAGATATCCGCACCAACGCGCAGCCCGGACTCGGTAATGGCGCGCATTGCGCCC  
AGCGCCATCTGATCGTTGGCAACCAGCATCGCAGTGGGAACGATGCCCTCATTACGCATTT  
GCATGGTTTGTGAAAACCGGACATGGCACTCCAGTCGCCTTCCCGTTCCGCTATCGGCTG  
AATTTGATTGCGAGTGAGATATTTATGCCAGCCAGCCAGACGCAGACGCGCCGAGACAGA  
ACTTAATGGGCCCCTAACAGCGCGATTTGCTGGTGACCCAATGCGACCAGATGCTCCAC  
GCCAGTCGCGTACCGTCTTCATGGGAGAAAATAATACTGTTGATGGGTGTCTGGTCAGAG  
ACATCAAGAAATAACGCCGGAACATTAGTGCAAGGCAGCTTCCACAGCAATGGCATCCTGG  
TCATCCAGCGGATAGTTAATGATCAGCCCACTGACGCGTTGCGCGAGAAGATTGTGCACCG  
CCGCTTTACAGGCTTCGACGCGCTTCGTTCTACCATCGACACCACCACGCTGGCACCCAG

TTGATCGGCGCGAGATTTAATCGCCGCGACAATTTGCGACGGCGCGTGCAGGGCCAGACT  
GGAGGTGGCAACGCCAATCAGCAACGACTGTTTGGCCGCCAGTTGTTGTGCCACGCGGTT  
GGGAATGTAATTCAGCTCCGCCATCGCCGCTTCCACTTTTTCCCGCGTTTTTCGCAGAAACG  
TGGCTGGCCTGGTTCACCACGCGGGAACGGTCTGATAAGAGACACCGGCATACTCTGCG  
ACATCGTATAACGTTACTGGTTTCACATTCACCACCCTGAATTGACTCTCTTCCGGGCGCTA  
TCATGCCATAACGCGAAAGGTTTTGCACCATTCCATGGGAATTCGCTAGCGCGGCCGCGAG  
CTGTTGACAATTAATCATCGGCTCGTATAATGTGTGGAATTGTGAGCGGATAACAATTCAC  
ACAGGAGATATCATATGAAAATTAAACTCTGGCAATCGTTGTTCTGTGCGGCTCTGTCCCTC  
AGTTCTACAGCGGCTCTGGCCGCTGCCACGACGGTTAATGGTGGGACCGTTCACTTTAAA  
GGGGAAGTTGTTAACGCCGCTTGCAGAGTTGATGCAGGCTCTGTTGATCAAACCGTTCAG  
TTAGGACAGGTTTCGTACCGCATCGCTGGCACAGGAAGGAGCAACCAGTTCTGCTGTCCGT  
TTAACATTCAGCTGAATGATTGCGATAACCAATGTTGCATCTAAAGCCGCTGTTGCCTTTTT  
AGGTACGGCGATTGATGCGGGTCATAACCAACGTTCTGGCTCTGCAGAGTTCAGCTGCGGG  
TAGCGCAACAAACGTTGGTGTGCAGATCCTGGACAGAACGGGTGCTGCGCTGACGCTGG  
ATGGTGCAGACATTTAGTTCAGAAACAACCCTGAATAACGGAACCAATACCATTCCGTTCCA  
GGCGCGTTATTTTGCAACCGGGGCGCAACCCCGGGTGCTGCTAATGCGGATGCGACCTT  
CAAGGTTTCAGTATCAATAACCTACCCAGGTTTCAGGGACGTCATTACGGGCAGGGATGCC  
ACCCTTGTGCGATAAAAATAACGATGAAAAGGAAGAGATTATTTCTATTAGCGTCGTTGCT  
GCCAATGTTTGTCTCTGGCCGGAATAAATGGAATACCACGTTGCCCGGCGGAAATATGCAA  
TTTCAGGGCGTCATTATTGCGGAAACTTGCCGATTGAAGCCGGTGATAAACAATGACG  
GTCAATATGGGGCAAATCAGCAGTAACCGGTTTCATGCGGTTGGGGAAGATAGCGCACCG  
GTGCCCTTTGTTATTCATTTACGGGAATGTAGCACGGTGGTGAAGTGAACGTGTAGGTGTGG  
CGTTTCACGGTGTGCGGATGGTAAAAATCCGGATGTGCTTCCGTGGGAGAGGGGCCAG  
GGATAGCCACCAATATTGGCGTAGCGTTGTTTGATGATGAAGGAAACCTCGTACCGATTAA  
TCGTCCTCCAGCAAACCTGGAACCGGCTTATTCAGGCTCTACTTCGCTACATTTTCATCGCC  
AAATATCGTGCTACCGGGCGTCGGGTTACTGGCGGCATCGCCAATGCCAGGCCTGGTTCT  
CTTTAACCTATCAGTAATTGTTTCAGCAGATAATGTGATAACAGGAACAGGACAGTGAGTAA  
TAAAAACGTCAATGTAAGGAAATCGCAGGAAATAACATTCTGCTTGCTGGCAGGTATCCTG  
ATGTTTCATGGCAATGATGGTTGCCGGACGCGCTGAAGCGGGAGTGGCCTTAGGTGCGACT  
CGCGTAATTTATCCGGCAGGGCAAAAACAAGAGCAACTTGCCGTGACAAATAATGATGAA  
AATAGTACCTATTTAATTCATCATGGGTGGAAAATGCCGATGGTGTAAAGGATGGTCGTTT  
TATCGTGACGCCTCCTCTGTTTGCAGTGAAGGGAAAAAAGAGAATACCTTACGTATTCTT  
GATGCAACAAATAACCAATTGCCACAGGACCGGGAAAAGTTTATTCTGGATGAACGTTAAA  
GCGATTCCGTCAATGGATAAATCAAATGACTGAGAATACGCTACAGCTCGCAATTATCA  
GCCGCATTAACCTGTAATATCGCCCGGCTAAATTAGCGTTGCCACCCGATCAGGCCGCAGA  
AAAATTAAGATTTGTCGTAGCGCGAATTCTCTGACGCTGATTAACCCGACACCCTATTACC  
TGACGGTAACAGAGTTGAATGCCGGAACCCGGGTTCTTGAAAATGCATTGGTGCCTCCAA

TGGGCGAAAGCACGGTTAAATTGCCTTCTGATGCAGGAAGCAATATTACTTACCGAACAAT  
AAATGATTATGGCGCACTTACCCCCAAAATGACGGGCGTAATGGAATAACGCAGGGGGAA  
TTTTTCGCCTGAATAAAAAGAATTGACTGCCGGGTGATTTTAAGCCGGAGGAATAATGTCA  
TATCTGAATTTAAGACTTTACCAGCGAAACACACAATGCTTGCATATTCGTAAGCATCGTTT  
GGCTGGTTTTTTTTGTCCGACTCGTTGTGCCTGTGCTTTTGCCGCACAGGCACCTTTGTCA  
TCTGCCGACCTCTATTTAATCCGCGCTTTTTAGCGGATGATCCCCAGGCTGTGGCCGATTT  
ATCGCGTTTTGAAAATGGGCAAGAATTACCGCCAGGGACGTATCGCGTCGATATCTATTTG  
AATAATGGTTATATGGCAACGCGTGATGTCACATTTAATACGGGCGACAGTGAACAAGGGA  
TTGTTCCCTGCCTGACACGCGCGCAACTCGCCAGTATGGGGCTGAATACGGCTTCTGTGCGC  
CGGTATGAATCTGCTGGCGGATGATGCCTGTGTGCCATTAACCACAATGGTCCAGGACGCT  
ACTGCGCATCTGGATGTTGGTCAGCAGCGACTGAACCTGACGATCCCTCAGGCATTTATGA  
GTAATCGCGCGCGTGGTTATATCCTCCTGAGTTATGGGATCCCGGTATTAATGCCGGATTG  
CTCAATTATAATTCAGCGGAAATAGTGTACAGAATCGGATTGGGGGTAACAGCCATTATGC  
ATATTTAAACCTACAGAGTGGGTAAATATTGGTGCCTGGCGTTTACGCGACAATACCACCT  
GGAGTTATAACAGTAGCGACAGATCATCAGGTAGCAAAAATAAATGGCAGCATATCAATAC  
CTGGCTTGAGCGAGACATAATACCGTTACGTTCCCGGCTGACGCTGGGTGATGGTTATACT  
CAGGGCGATATTTTCGATGGTATTAACTTTCGCGGCGCACAATTGGCCTCAGATGACAATAT  
GTTACCCGATAGTCAAAGAGGATTTGCCCGGTGATCCACGGTATTGCTCGTGGTACTGCA  
CAGGTCACTATTAACAAAATGGGTATGACATTTATAATAGTACGGTGCCACCGGGGCCTTT  
TACCATCAACGATATCTATGCCGAGGTAATAGTGGTGACTTGCAGGTAACGATCAAAGAG  
GCTGACGGCAGCACGCAGATTTTTACCGTACCCTATTCGTCAGTCCCGCTTTTGCAACGTG  
AAGGGCATACTCGTTATTCCATTACGGCAGGAGAATACCGTAGTGGAATGCGCAGCAGG  
AAAAAACCCGCTTTTTCCAGAGTACATTACTCCACGGCCTTCCGGCTGGCTGGACAATATA  
TGTTGGAACGCAACTGGCGGATCGTTATCGTGCTTTTAATTTTCGGTATCGGGAAAAACATG  
GGGGCACTGGGCGCTCTGTCTGTGGATATGACGCAGGCTAATTCACACTTCCCGATGACA  
GTCAGCATGACGGACAATCGGTGCGTTTTCTCTATAACAAATCGCTCAATGAATCAGGCAC  
GAATATTCAGTTAGTGGGTACCCTTATTCGACCAGCGGATATTTAATTTTCGCTGATACAA  
CATAACAGTCGAATGAATGGCTACAACATCGAAACACAGGACGGAGTTATTCAGGTAAAGC  
CGAAATTCACCGACTATTACAACCTCGCTTATAACAAACGCGGGAAATTACAACCTACCCGT  
TACTCAGCAACTCGGGCGCACATCAACACTGTATTTGAGTGGTAGCCATCAAACCTTATTGG  
GGAACGAGTAATGTCGATGAGCAATTCCAGGCTGGATTAAATACTGCGTTCGAAGATATCA  
ACTGGACGCTCAGCTATAGCCTGACGAAAAACGCTGGCAAAAAGGACGGGATCAGATG  
TTAGCGCTTAACGTCAATATTCCTTTTCAGCCACTGGCTGCGTTCTGACAGTAAATCTCAGTG  
GCGACATGCCAGTGCCAGCTACAGCATGTCACACGATCTCAACGGTCGGATGACCAATCT  
GGCTGGTGTATACGGTACGTTGCTGGAAGACAACAACCTCAGCTATAGCGTGCAAACCGG  
CTATGCCGGGGGAGGCGATGGAAATAGCGGAAGTACAGGCTACGCCACGCTGAATTATCG  
CGGTGGTTACGGCAATGCCAATATCGGTTACAGCCATAGCGATGATATTAAGCAGCTCTATT

ACGGAGTCAGCGGTGGGGTACTGGCTCATGCCAATGGCGTAACGCTGGGGCAGCCGTTAA  
ACGATACGGTGGTGCTTGTAAAGCGCCTGGCGCAAAAGATGCAAAAGTCGAAAACCAG  
ACGGGGGTGCGTACCGACTGGCGTGGTTATGCCGTGCTGCCTTATGCCACTGAATATCGGG  
AAAATAGAGTGGCGCTGGATACCAATACCCTGGCTGATAACGTCGATTTAGATAACGCGGT  
TGCTAACGTTGTTCCCACTCGTGGGGCGATCGTGCGAGCAGAGTTTAAAGCGCGCGTTGG  
GATAAACTGCTCATGACGCTGACCCACAATAATAAGCCGCTGCCGTTTGGGGCGATGGTG  
ACATCAGAGAGTAGCCAGAGTAGCGGCATTGTTGCGGATAATGGTCAGGTTTACCTCAGC  
GGAATGCCTTTAGCGGGAAAAGTTCAGGTGAAATGGGGAGAAGAGGAAAATGCTCACTG  
TGTCGCCAATTATCAACTGCCACCAGAGAGTCAGCAGCAGTTATTAACCCAGCTATCAGCT  
GAATGTCGTTAAGGGGGCGTGATGAGAAACAAACCTTTTTATCTTCTGTGCGCTTTTTTGT  
GGCTGGCGGTGAGTCACGCTTTGGCTGCGGATAGCACGATTACTATCCGCGGCTATGTCAG  
GGATAACGGCTGTAGTGTGGCCGCTGAATCAACCAATTTTACTGTTGATCTGATGGAAAAC  
GCGGCGAAGCAATTTAACAACATTGGCGCGACGACTCCTGTTGTTCCATTTTCGTATTTTGC  
TGTCACCCTGTGGTAATGCCGTTTCTGCCGTAAAGGTTGGGTTTACTGGCGTTGCAGATAG  
CCACAATGCCAACCTGCTTGCACCTGAAAATACGGTGTGTCAGCGGCTTCGGGACTGGGAAT  
ACAGCTTCTGAATGAGCAGCAAAATCAAATACCCCTTAATGCTCCATCGTCCGCGCTTTCG  
TGGACGACCCTGACGCCGGGTAAACCAAATACGCTGAATTTTACGCCCGGCTAATGGCG  
ACACAGGTGCCTGTCACTGCGGGGCATATCAATGCCACGGCTACCTTCACTCTTGAATATC  
AGTAACTGGAGATGCTCATGAAATGGTGCAAACGTGGGTATGTATTGGCGGCAATATTGGC  
GCTCGCAAGTGCAGCAGATACAGGCAGCCGATGTCACCATCACGGTGAACGGTAAGGTCGT  
CGCCAAACCGTGTACGGTTTCCACCACCAATGCCACGGTTGATCTCGGCGATCTTTATTCT  
TTCAGTCTTATGTCTGCCGGGGCGGCATCGGCCTGGCATGATGTTGCGCTTGAGTTGACTA  
ATTGTCCGGTGGGAACGTCGAGGGTCACTGCCAGCTTCAGCGGGGCAGCCGACAGTACC  
GGATATTATAAAAACCAGGGGACCGCGCAAAACATCCAGTTAGAGCTACAGGATGACAGT  
GGCAACACATTGAATACTGGCGCAACCAAAAACAGTTCAGGTGGATGATTCCTCACAATCA  
GCGCACTTCCCGTTACAGGTGAGAGCATTGACAGTAAATGGCGGAGCCACTCAGGGAACC  
ATTCAGGCAGTGATTAGCATCACCTATACCTACAGCTGAACCCGAAGAGATGATTGTAATG  
AAACGAGTTATTACCCTGTTTGTGCTGACTGCTGATGGGCTGGTCGGTAAATGCCTGGTCATT  
CGCCTGTAAAACCGCCAATGGTACCGCTATCCCTATTGGCGGTGGCAGCGCCAATGTTTAT  
GTAAACCTTGCGCCCGTTCGTGAATGTGGGGCAAACCTGGTCGTGGATCTTTCGACGCAA  
ATCTTTTGCCATAACGATTATCCGGAAACCATTACAGACTATGTCACACTGCAACGAGGCT  
CGGCTTATGGCGGCGTGTATCTAATTTTCCGGGACCGTAAAATATAGTGGCAGTAGCTAT  
CCATTTCTACCACCAGCGAAACGCCGCGCGTTGTTTATAATTCGAGAACGGATAAGCCGT  
GGCCGGTGGCGCTTTATTTGACGCCTGTGAGCAGTGCGGGGCGGGGTGGCGATTAAAGCTG  
GCTCATTAATTGCCGTGCTTATTTTGCAGACAGACCAACAACACTATAACAGCGATGATTTCCAG  
TTTGTGTGGAATATTTACGCCAATAATGATGTGGTGGTGCCTACTGGCGGCTGCGATGTTTC  
TGCTCGTGATGTCACCGTTACTCTGCCGGACTACCCTGGTTCAGTGCCAATTCCTCTTACC

GTTTATTGTGCGAAAAGCCAAAACCTGGGGTATTACCTCTCCGGCACAACCGCAGATGCG  
GGCAACTCGATTTTCACCAATACCGCGTCGTTTTACCTGCACAGGGCGTCGGCGTACAGT  
TGACGCGCAACGGTACGATTATTCCAGCGAATAACACGGTATCGTTAGGAGCAGTAGGGA  
CTTCGGCGGTGAGTCTGGGATTAACGGCAAATTATGCACGTACCGGAGGGCAGGTGACTG  
CAGGGAATGTGCAATCGATTATTGGCGTGACTTTTGTTTATCAATAAAGAAATCACAGGAC  
ATTGCTAATGCTGGTACGCAATATTACCTGAAGCTAAAAACCTGCACGTTAGCCCTTTGTAG  
GCCAGATAAGACGCGTCAGCGTCGCATCTGGCATAAACAAGCGCACTTTGCTGGTCTGT  
TCCCCTCATCTGTTGACAATTAATCATCGGCTCGTATAATGTGTGGAATTGTGAGCGGATAA  
CAATTTACACGTAAGAATTCTCCATCAGCTAAACGCATTTAAGGATCAAAAATTATGGCAC  
AAGTCATTAATACCAACAGCCTCTCGCTGATCACTCAAATAATATCAACAAGAACCAGTC  
TGCGCTGTCGAGTTCTATCGAGCGTCTGTCTTCTGGCTTGCCTATTAACAGCGCGAAGGAT  
GACGCAGCGGGTCAGGCGATTGCTAACCGTTTTACCTCTAACATTAAGGCCTGACTCAG  
GCGGCCCGTAACGCCAACGACGGTATCTCCGTTGCGCAGACCACCGAAGGCGCGCTGTCC  
GAAATCAACAACAACCTTACAGCGTGTGCGTGAACCTGACGGTACAGGCCACTACCGGTACT  
AACTCTGAGTCTGATCTGTCTTCTATCCAGGACGAAATTAATCCCCTCTGGATGAAATTG  
ACCGCGTATCTGGTCAGACCCAGTTCAACGGCGTGAACGTGCTGGCAAAAAATGGCTCCA  
TGAAAATCCAGGTTGGCGCAAATGATAACCAGACTATCACTATCGATCTGAAGCAGATTGA  
TGCTAAAACCTTTGGCCTTGATGGTTTTAGCGTTAAAAATAACGATACAGTTACCACTAGT  
GCTCCAGTAACTGCTTTTGGTGTCTACCACCACAAACAATATTAACCTTACTGGAATTACCCT  
TTCTACGGAAGCAGCCACTGATACTGGCGGAACCTAACCCAGCTTCAATTGAGGGTGTTTAT  
ACTGATAATGGTAATGATTACTATGCGAAAATCACCGGTGGTGATAACGATGGGAAGTATTA  
CGCAGTAACAGTTGCTAATGATGGTACAGTGACAATGGCGACTGGAGCAACGGCAAATGC  
AACTGTAACCTGATGCAAATACTACTAAAGCTACAACCTATCACTTCAGGCGGTACACCTGTT  
CAGATTGATAATACTGCAGGTTCCGCAACTGCCAACCTTGGTGTCTTTAGCTTAGTAAAAC  
TGCAGGATTCCAAGGGTAATGATACCGATACATATGCGCTTAAAGATACAAATGGCAATCTT  
TACGCTGCGGATGTGAATGAACTACTGGTGTCTTTCTGTAAAACCTATTACCTATACTGA  
CTCTTCCGGTGCCGCCAGTTCTCCAACCGCGGTCAAACCTGGGCGGAGATGATGGCAAAAC  
AGAAGTGGTCGATATTGATGGTAAAACATACGATTCTGCCGATTTAAATGGCGGTAATCTGC  
AAACAGGTTTGACTGCTGGTGGTGAGGCTCTGACTGCTGTTGCAAATGGTAAAACCACGG  
ATCCGCTGAAAGCGCTGGACGATGCTATCGCATCTGTAGACAAATTCCGTTCTTCCCTCGG  
TGCGGTGCAAACCGTCTGGATTCCGCGGTTACCAACCTGAACAACACCACTACCAACCT  
GTCTGAAGCGCAGTCCCGTATTCAGGACGCCGACTATGCGACCGAAGTGTCCAATATGTGC  
AAAGCGCAGATCATCCAGCAGGCCGTAACCTCCGTGTTGGCAAAAGCTAACCAAGGTACCG  
CAGCAGGTTCTGTCTCTGCTGCAGGGTTAATCGTTGTAACCTGATTAACCTGAGACTGACGG  
TCCGACACCCTATTACCGTAAGGAGGTCTTTTTATGCATACCTCCGAGTTGCTGAAACACAT  
TTATGACATCAACTTGTCAATTTACTACTTGCACAGCGTTTGATTGTTTACAGGACAAAGCGT  
CCGCTATGTTTCGTCTCGGCATAAATGAAGAAATGGCGACAACGTTAGCGGCACTGACTCT



TCCGCAAATGGTTAAGCTGGCAGAAACCAATCAACTGGTTTGTCACTTCCGTTTTGACAG  
CCACCAGACGATTACTCAGTTGACGCAAGATTCCCGCGTTGACGATCTCCAGCAAATTCAT  
ACCGGCATCATGCTCTCAACACGCTTGCTGAATGATGTTAATCAGCCTGAAGAAGCGCTGC  
GCAAGAAAAGGGCCTGATCATGAGTGAAAAAAGCATTGTTTCAGGAAGCGCGGGATATTCA  
GCTGGCAATGGAATTGATCACCTGGGCGCTCGTTTGCAGATGCTGGAAAGCGAAACACA  
GTTAAGTCGCGGACGCCTGATAAACTTTATAAAGAAGTGCAGCGGAAGCCCACCGCCGAA  
AGGCATGCTGCCATTCTCAACCGACTGGTTTATGACCTGGGAACAAAACGTTTCATGCTTCG  
ATGTTCTGTAATGCATGGCAGTTTTTACTGAAAACCGGTTTTGTGTAATGGCGTCGATGCGG  
TGATCAAAGCCTACCGTTTATACCTTGAACAGTGCCACAAGCAGAAGAAGGACCACTGC  
TGGCATTAACCCGTGCCTGGACATTGGTGCGGTTTTGTTGAAAGTGGATTACTGCAACTTTC  
CAGCTGCAACTGCTGCGGCGGCAATTTTATTACCCACGCTCACCAGCCTGTTGGCAGCTTT  
GCCTGCAGCTTATGTCAACCGCCATCCCGGGCAGTAAAAAGACGTAAACTTTCCAGAAT  
CCTGCCGATATTATCCCACAACCTGCTGGATGAACAGAGAGTACAGGCTGTTTAACTGATAC  
GGTGAGGTCTAGACACCACTAGTTTTCTGCAGTCTTCAGATCCTCTACGCCGGACGCATC  
GTGGCCGGATCTTGCGGCCAGCTTTATGCTTGTAACCGTTTTGTGAAAAAATTTTTAAAA  
TAAAAAAGGGGACCTCTAGGGTCCCAATTAATTAGTAATATAATCTATTAAGGTCATTCA  
AAAGGTCATCCACCGGATCAATTCCCCTGCTCGCAGGATCCCCGTAATCAACAGGTTGA  
ACTGCTGATCTTCAGATCCTCTACGCCGGACGCATCGTGGCCGGATCTTGCGGCCAGCTTT  
ATGCTTGTAACCGTTTTGTGAAAAAATTTTTAAAATAAAAAAGGGGACCTCTAGGGTCCC  
CAATTAATTAGTAATATAATCTATTAAGGTCATTCAAAGGTCATCCACCGGATCAATTCCC  
CTGCTCGCGCAGGCTGGGTGCCAAGCTCTCGGGTAACATCAAGGCCCGATCCTTGAGGCC  
CTTGCCCTCCCGCACGATGATCGTGCCGTGATCGAAATCCAGATCCTTGACCCGCAGTTGC  
AAACCCTCACTGATCCGGCTCACGGTAACTGATGCCGTATTTGCAGTACCAGCGTACGGCC  
CACAGAATGATGTCACGCTGAAAATGCCGGCCTTTGAATGGGTTTCATGTGCAGCTCCATCA  
GCAAAGGGGATGATAAGTTTATCACACCGACTATTTGCAACAGTGCCGTTGATCGTGCT  
ATGATCGACTGATGTCATCAGCGGTGGAGTGCAATGTCGTGCAATACGAATGGCGAAAAG  
CCGAGCTCATCGGTGAGCTTCTCAACCTTGGGGTTACCCCCGGCGGTGTGCTGCTGGTCC  
ACAGCTCCTTCCGTAGCGTCCGGCCCCCTCGAAGATGGGCCACTTGGACTGATCGAGGCC  
TGCGTGCTGCGCTGGGTCCGGGAGGGACGCTCGTCATGCCCTCGTGGTTCAGGTCTGGACG  
ACGAGCCGTTTCGATCCTGCCACGTCGCCCCGTTACACCGGACCTTGGAGTTGTCTCTGACA  
CATTCTGGCGCCTGCCAATGTAAAGCGCAGCGCCCATCCATTTGCCTTTGCGGCAGCGGG  
GCCACAGGCAGAGCAGATCATCTCTGATCCATTGCCCTGCCACCTCACTCGCCTGCAAGC  
CCGGTCGCCCCGTGTCATGAACTCGATGGGCAGGTACTTCTCCTCGGCGTGGGACACGAT  
GCCAACACGACGCTGCATCTTGCCGAGTTGATGGCAAAGGTTCCCTATGGGGTGCCGAGA  
CACTGCACCATTCTTCAGGATGGCAAGTTGGTACGCGTCGATTATCTCGAGAATGACCACT  
GCTGTGAGCGCTTTGCCTTGGCGGACAGGTGGCTCAAGGAGAAGAGCCTTCAGAAGGAA  
GGTCCAGTCGGTCATGCCTTTGCTCGGTTGATCCGCTCCCGCGACATTGTGGCGACAGCCC

TGGGTCAACTGGGCCGAGATCCGTTGATCTTCCTGCATCCGCCAGAGGCCGGGATGCGAAG  
AATGCGATGCCGCTCGCCAGTCGATTGGCTGAGCTCATGAGCGGAGAACGAGATGACGTT  
GGAGGGGGCAAGGTCGCGCTGATTGCTGGGGCAACACATCATTGCAGCACTGGGGCCAGAT  
GGTAAGCCCTCCCGTATCGTAGTTATCTACACGACGGGGAGTCAGGCAACTATGGATGAAC  
GAAATAGACAGATCGCTGAGATAGGTGCCTCACTGATTAAGCATTGGTAACTGTCAGACCA  
AGTTTACTCATATATACTTTAGATTGATTTAAAACCTTCATTTTTTAATTTAAAAGGATCTAGGT  
GAAGATCCTTTTTGATAATCTCATGACCAAATCCCTTAACGTGAGTTTTTCGTTCCACTGAG  
CGTCAGACCCCGTAGAAAAGATCAAAGGATCTTCTTGAGATCCTTTTTTTCTGCGCGTAAT  
CTGCTGCTTGCAAAC

| Primer                  | Sequence (5'-3')                                          |
|-------------------------|-----------------------------------------------------------|
| <i>fimAP1</i> (forward) | gtttttgaaaggaaagcagcatggattgtgtaggctggagctgc              |
| <i>fimAP2</i> (forward) | cgactgcccattgtcgatttagaaatagtttttgaaggaaagcagcatgg        |
| <i>fimAP1</i> (reverse) | cctgggtaggttattgatactgaaccttgaaattccgggatccgtcg           |
| <i>fimAP2</i> (reverse) | ccgtaatgacgtccctgaacctgggtaggttattgatactgaaccttg          |
| <i>fliC</i> (forward)   | ggtgccgcccagttctccaaccgcggtcaaactggg                      |
| <i>fliC</i> (reverse)   | ggttgagaactggcggcaccggaagagtcagtatag                      |
| p2207P1 (forward)       | aaacaaagcgcactttgctggtctgtcccctcatctgttgacaattaatcatcggtc |
| p2207P1 (reverse)       | tcagcagttcaacctgtgatagtaggggatcctgcgagcaggggaattgatcc     |

**Table S1** Primers used in this study.

| Strains                                    | CFU mL <sup>-1</sup> |
|--------------------------------------------|----------------------|
| MG1655+p(blank)                            | 2.0×10 <sup>11</sup> |
| MG1655Δ <i>fimA</i> +p(blank)              | 2.3×10 <sup>11</sup> |
| MG1655Δ <i>fimA</i> +p( <i>fim</i> )       | 5.9×10 <sup>10</sup> |
| MG1655Δ <i>fimA</i> +p( <i>fim-flhDC</i> ) | 4.8×10 <sup>10</sup> |

**Table S2** Number of Colony Forming Units (CFU) per mL of OD<sub>600</sub> = 1 for different strains induced with 10 μM concentration of IPTG.

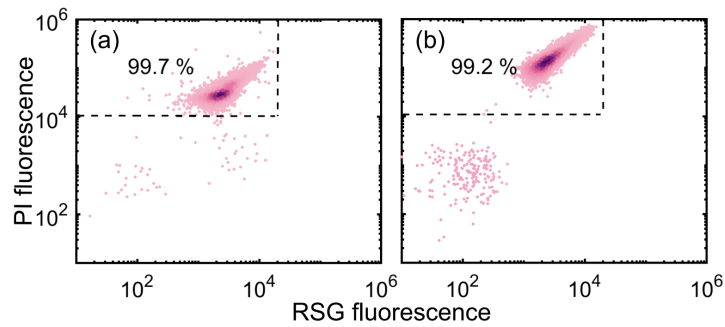

**Fig. S1** (a) Cells treated with 70% ethanol for 1 h and (b) cells killed by heating at 90°C for 15 mins were stained with Propidium Iodide and Redox Sensor Green and analyzed by flow cytometry as a positive control to determine cell viability. The gating cutoffs for the PI and RSG Fluorescence were 10,000 and 20,000 respectively. The horizontal and vertical dashed lines represent the gating cutoffs for the PI and RSG Fluorescence respectively. The percentage value corresponds to the percent of dead and membrane-compromised cells in the cell population.

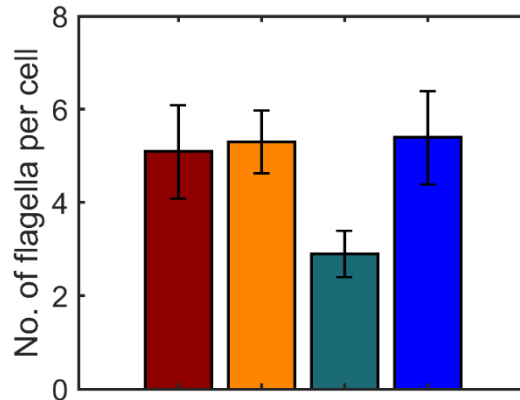

**Fig. S2** Average number of flagella per cell for different strains: (■) MG1655+p(blank) + 10 μM IPTG; (■) MG1655Δ*fimA*+p(blank) + 10 μM IPTG; (■) MG1655Δ*fimA*+p(*fim*) + 10 μM IPTG; (■) MG1655Δ*fimA*+p(*fim-flhDC*) + 10 μM IPTG.

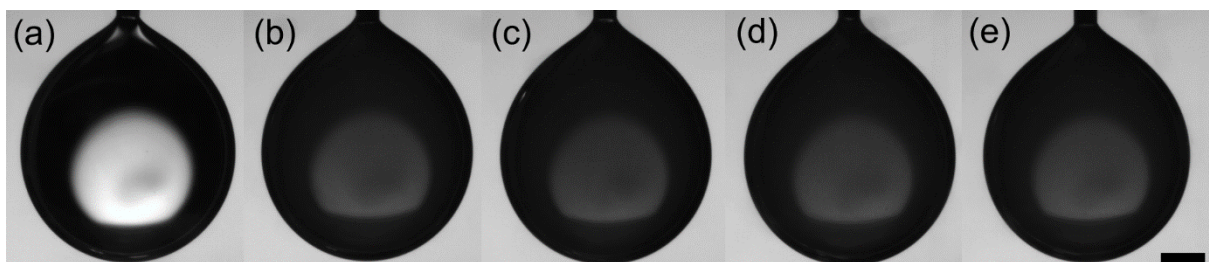

**Fig. S3** Images of the pendant drop of bacterial suspension ( $OD_{600} = 2$ ) of different strains (a) PBS with no cells; (b) MG1655+p(blank) + 10 μM IPTG; (c) MG1655Δ*fimA*+p(blank) + 10 μM IPTG; (d) MG1655Δ*fimA*+p(*fim*) + 10 μM IPTG; (e) MG1655Δ*fimA*+p(*fim-flhDC*) + 10 μM IPTG in hexadecane. Scale bar is 1 mm.

|                                                             | MG1655+<br>p(blank) | MG1655 $\Delta$ <i>fimA</i> +<br>p(blank) | MG1655 $\Delta$ <i>fimA</i> +<br>p( <i>fim</i> ) | MG1655 $\Delta$ <i>fimA</i> +<br>p( <i>fim-fliC-flhDC</i> ) |
|-------------------------------------------------------------|---------------------|-------------------------------------------|--------------------------------------------------|-------------------------------------------------------------|
| MG1655+<br>p(blank)                                         | -                   | N                                         | Y                                                | Y                                                           |
| MG1655 $\Delta$ <i>fimA</i> +<br>p(blank)                   | N                   | -                                         | Y                                                | Y                                                           |
| MG1655 $\Delta$ <i>fimA</i> +<br>p( <i>fim</i> )            | Y                   | Y                                         | -                                                | N                                                           |
| MG1655 $\Delta$ <i>fimA</i> +<br>p( <i>fim-fliC-flhDC</i> ) | Y                   | Y                                         | N                                                | -                                                           |

**Table S3** A 4×4 matrix indicating whether the difference in the interfacial tension values between different strains is significant at the  $p < 0.05$  level.

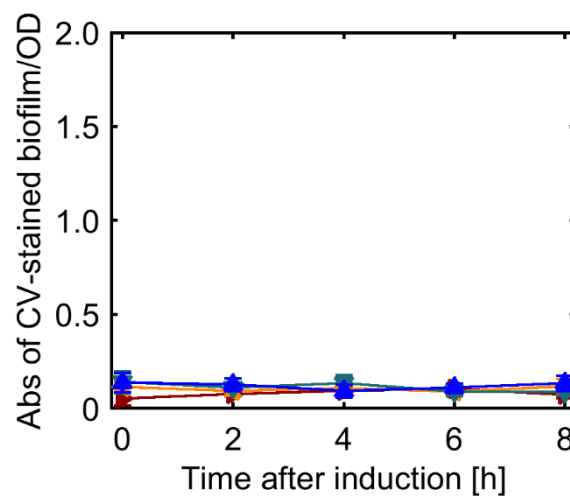

**Fig. S4** MG1655 $\Delta$ *fimA*+p(*fim*) and MG1655 $\Delta$ *fimA*+p(*fim-fliC-flhDC*) strains do not form biofilm in the absence of IPTG. Symbols: (►) MG1655+p(blank) + 0  $\mu$ M IPTG; (◄) MG1655 $\Delta$ *fimA*+p(blank) + 0  $\mu$ M IPTG; (▼) MG1655 $\Delta$ *fimA*+p(*fim*) + 0  $\mu$ M IPTG; (▲) MG1655 $\Delta$ *fimA*+p(*fim-fliC-flhDC*) + 0  $\mu$ M IPTG.

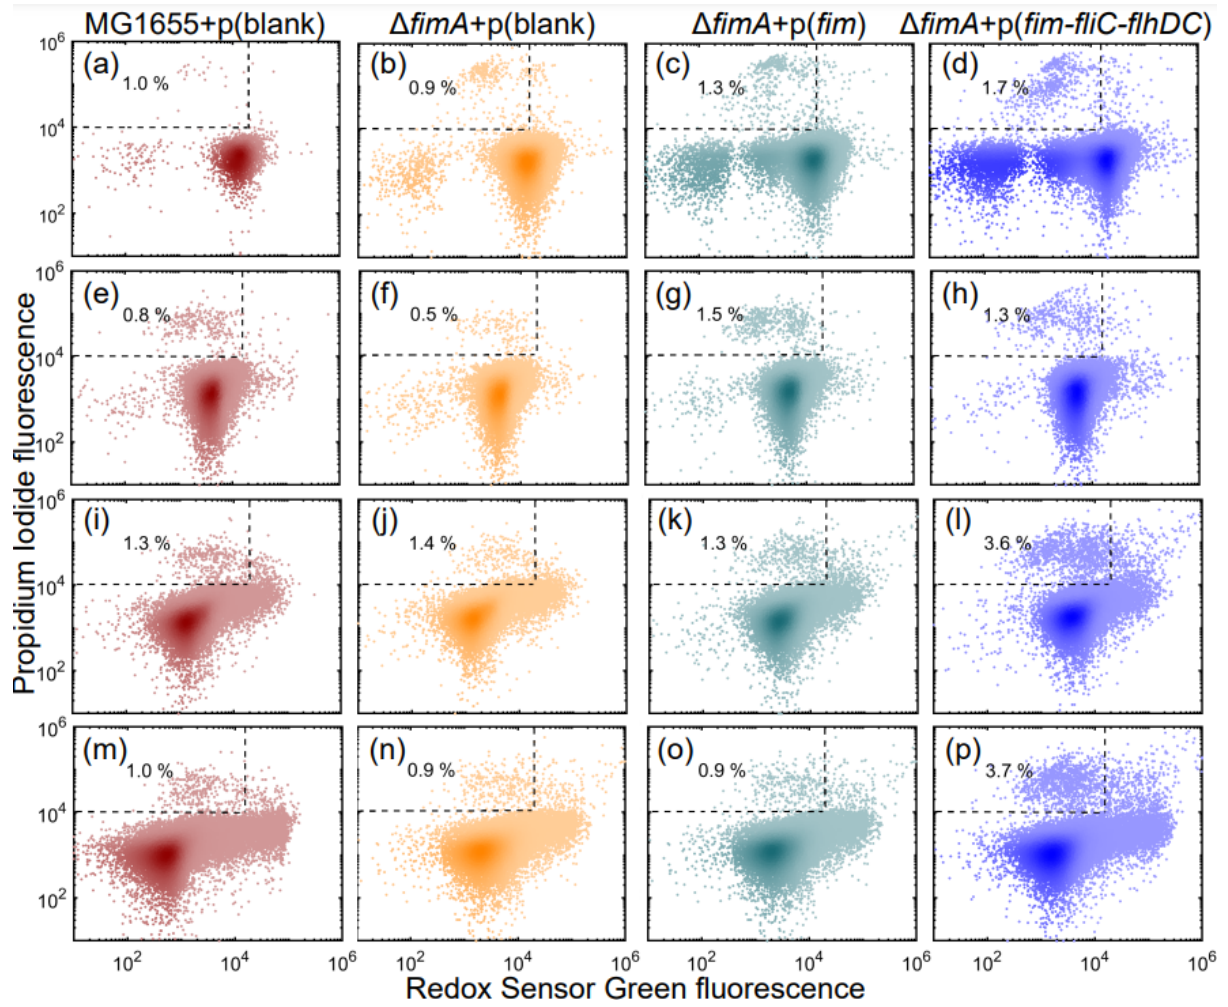

**Fig. S5** PI and RSG staining of different strains (from left to right: MG1655+p(blank), MG1655 $\Delta fimA+p(\text{blank})$ , MG1655 $\Delta fimA+p(\text{fim})$ , and MG1655 $\Delta fimA+p(\text{fim-fliC-flhDC})$ ) at (a – d) 0 h, (e – h) 2 h, (i – l) 6 h, and (m – p) 8 h after induction with 10  $\mu\text{M}$  IPTG.

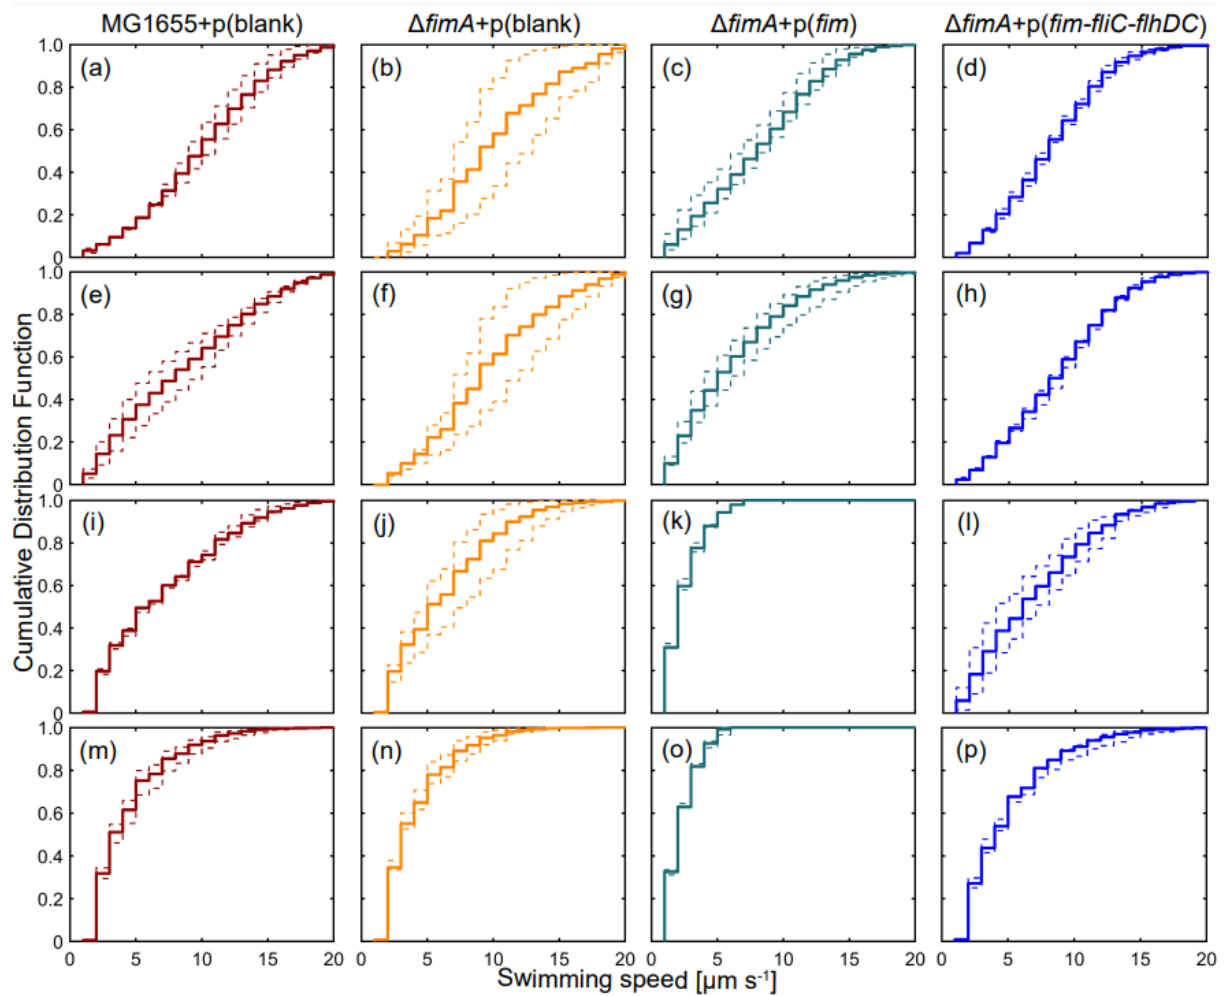

**Fig. S6** The cumulative distribution function of instantaneous swimming speeds of different strains (from left to right: MG1655+p(blank), MG1655 $\Delta$ *fimA*+p(blank), MG1655 $\Delta$ *fimA*+p(*fim*), and MG1655 $\Delta$ *fimA*+p(*fim-fliC-flhDC*)) at (a – d) 0 h, (e – h) 2 h, (i – l) 6 h, and (m – p) 8 h after induction with 10  $\mu$ M IPTG.

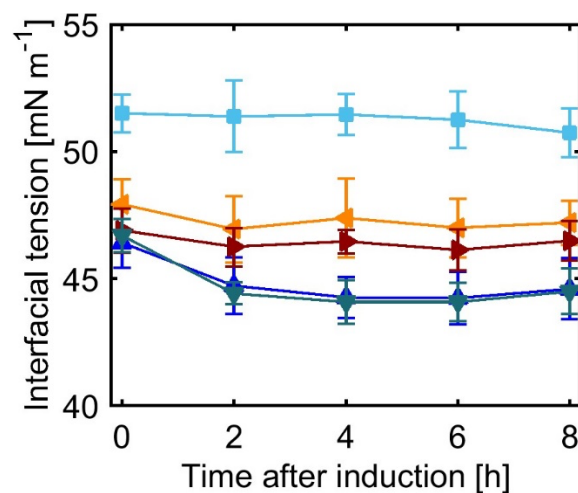

**Fig. S7** Measurement of interfacial tension of the bacteria-hexadecane interface for different strains at various time points after induction with 10  $\mu$ M IPTG. Symbols: (►) MG1655+p(blank) + 10  $\mu$ M IPTG; (◄) MG1655 $\Delta$ *fimA*+p(blank) + 10  $\mu$ M IPTG; (▼) MG1655 $\Delta$ *fimA*+p(*fim*) + 10  $\mu$ M IPTG; (▲) MG1655 $\Delta$ *fimA*+p(*fim-fliC-flhDC*) + 10  $\mu$ M IPTG.

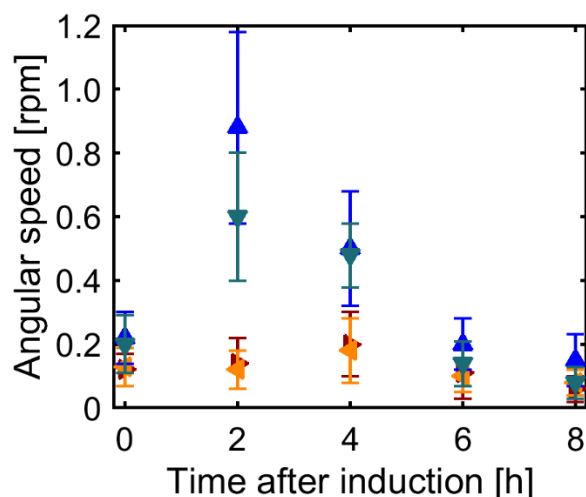

**Fig. S8** Angular speed of hexadecane droplets of 25  $\mu\text{m}$  diameter driven by different strains at various time points after induction with 10  $\mu\text{M}$  IPTG. Symbols: ( $\blacktriangleright$ ) MG1655+p(blank) + 10  $\mu\text{M}$  IPTG; ( $\blacktriangleleft$ ) MG1655 $\Delta$ *fimA*+p(blank) + 10  $\mu\text{M}$  IPTG; ( $\blacktriangledown$ ) MG1655 $\Delta$ *fimA*+p(*fim*) + 10  $\mu\text{M}$  IPTG; ( $\blacktriangle$ ) MG1655 $\Delta$ *fimA*+p(*fim-flhDC*) + 10  $\mu\text{M}$  IPTG.

#### Supplementary movies:

[S1.avi](#)

[S2.avi](#)

[S3.avi](#)

[S4.avi](#)

S1.avi: Rotation behavior of hexadecane droplet driven by MG1655+p(blank) strain induced with 10  $\mu\text{M}$  IPTG at cell concentration of  $\text{OD}_{600} = 1$ .

S2.avi: Rotation behavior of hexadecane droplet driven by MG1655 $\Delta$ *fimA*+p(blank) strain induced with 10  $\mu\text{M}$  IPTG at cell concentration of  $\text{OD}_{600} = 1$ .

S3.avi: Rotation behavior of hexadecane droplet driven by MG1655 $\Delta$ *fimA*+p(*fim*) strain induced with 10  $\mu\text{M}$  IPTG at cell concentration of  $\text{OD}_{600} = 1$ .

S4.avi: Rotation behavior of hexadecane droplet driven by MG1655 $\Delta$ *fimA*+p(*fim-flhDC*) strain induced with 10  $\mu\text{M}$  IPTG at cell concentration of  $\text{OD}_{600} = 1$ .

#### REFERENCES

1. K. A. Datsenko and B. L. Wanner, *Proc. Natl. Acad. Sci. U. S. A.*, 2000, **97**, 6640–6645.
2. Z. Wang, A. Doshi, R. Chowdhury, Y. Wang, C. D. Maranas and P. C. Cirino, *Protein Eng. Des. Sel.* 2020, **33**, gzaa027.
